# Supplementary material for: Integrated Data Analysis Uncovers New COVID-19 Related Genes and Potential Drug Re-Purposing Candidates
Source: MDPI journal article supplement (doi:10.3390/ijms24021431), 2023-01-11
Supplement: s1 [file s1]

---

*Supplementary Material for*  
*Integrated data analysis uncovers new COVID-19*  
*related genes and potential drug re-purposing*  
*candidates*

---

Alexandros Xenos<sup>1,2,†</sup>, Noël Malod-Dognin<sup>1,3,†</sup>, Carme Zambrana<sup>1,2</sup>

Nataša Pržulj<sup>1,3,4\*</sup>

<sup>1</sup>Barcelona Supercomputing Center (BSC), 08034 Barcelona, Spain.

<sup>2</sup>Universitat Politècnica de Catalunya (UPC), 08034 Barcelona, Spain

<sup>3</sup>Department of Computer Science, University College London,  
WC1E 6BT London, United Kingdom.

<sup>4</sup>ICREA, Pg. Lluís Companys 23, 08010 Barcelona, Spain.

This Supplementary Material document contains Supplementary Figure S1 and Supplementary Tables S1 to S5.

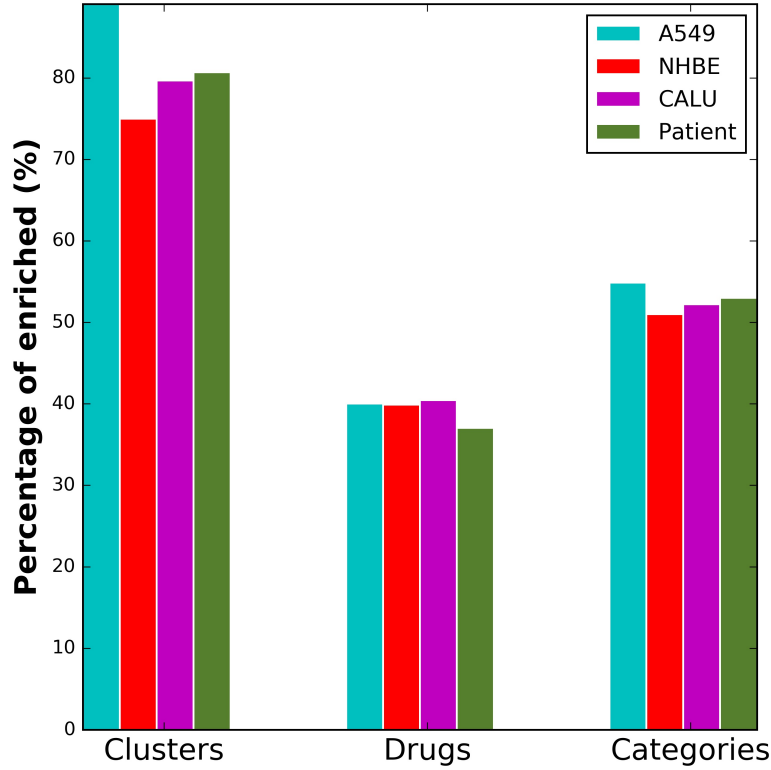

Supplementary Figure S1: **Drug matrix factor enrichments.** For the patient and for each cell-line (color coded), we compute three types of enrichments: the percentage of clusters of drugs having at least one of the Drug Categories (annotations) of the drugs in the cluster enriched (denoted by “Clusters” on the horizontal axis), the percentage of drugs having at least one of their annotations enriched in their clusters over all annotated drugs (denoted by “Drugs” on the horizontal axis) and the percentage of Drug Categories enriched (denoted by “Categories” on the horizontal axis).

| Cell line | Annotation type | Jaccard PPI | Jaccard COEX | Jaccard GI |
|-----------|-----------------|-------------|--------------|------------|
| A549      | GO-BP           | 0.31        | 0.26         | 0.12       |
|           | RP              | 0.67        | 0.65         | 0.17       |
| NHBE      | GO-BP           | 0.29        | 0.31         | 0.08       |
|           | RP              | 0.69        | 0.6          | 0.35       |
| CALU      | GO-BP           | 0.31        | 0.23         | 0.11       |
|           | RP              | 0.69        | 0.62         | 0.08       |
| Patient   | GO-BP           | 0.17        | 0.19         | 0.08       |
|           | RP              | 0.56        | 0.56         | 0.13       |

Supplementary Table S1: **Enriched functions in infected and control networks are different.** For each cell line and patient data (column 1) we compute the Jaccard similarity between the enriched functions (GO-BP and RP terms, column 2) in the control and the infected iCells in the PPI network (column 3), in the COEX network (column 4) and in the GI network (column 5).

| Cell line | Annotation type | #Uniquely enriched in infected |
|-----------|-----------------|--------------------------------|
| A549      | GO-BP           | 872                            |
|           | RP              | 202                            |
| NHBE      | GO-BP           | 560                            |
|           | RP              | 268                            |
| CALU      | GO-BP           | 555                            |
|           | RP              | 147                            |
| Patient   | GO-BP           | 491                            |
|           | RP              | 108                            |

Supplementary Table S2: **Number of uniquely enriched functions in infected iCells.** For each cell line and patient data (column 1) we compute the number of uniquely enriched functions (GO-BP and RP, column 2) in the infected iCells (column 3).

| Cell line | Network type | #Unique to infected | #Unique to control | #Common                 |
|-----------|--------------|---------------------|--------------------|-------------------------|
| A549      | PPI          | 2,499 (1.39%)       | 1,399 (0.78%)      | 176,329 (97.84%)        |
|           | COEX         | 16,330 (2.69%)      | 14,393 (2.37%)     | 577,214 (94.95%)        |
|           | GI           | 254 (1.10%)         | 739 (3.19%)        | 22,164 (95.71%)         |
|           | iCell        | 375,321 (31.15%)    | 367,853 (30.53%)   | <b>461,756 (38.32%)</b> |
| NHBE      | PPI          | 1,707 (0.95%)       | 4,463 (2.49%)      | 173,185 (96.56%)        |
|           | COEX         | 12,965 (2.17%)      | 33,149 (5.54%)     | 552,212 (92.29%)        |
|           | GI           | 233 (1.01%)         | 1,069 (4.63%)      | 21,794 (94.36%)         |
|           | iCell        | 331,303 (28.72%)    | 365,157 (31.65%)   | <b>457,217 (39.63%)</b> |
| CALU      | PPI          | 9,683 (5.41%)       | 3,082 (1.72%)      | 166,147 (92.87%)        |
|           | COEX         | 60,724 (9.72%)      | 25,472 (4.08%)     | 538,825 (86.21%)        |
|           | GI           | 2,777 (13.12%)      | 663 (3.13%)        | 17,728 (83.75%)         |
|           | iCell        | 442,421 (37.25%)    | 382,304 (32.19%)   | <b>362,863 (30.55%)</b> |
| Patient   | PPI          | 2,313 (1.36%)       | 79,966 (46.87%)    | 88,318 (51.77%)         |
|           | COEX         | 24,112 (3.81%)      | 392,203 (61.92%)   | 217,101 (34.27%)        |
|           | GI           | 672 (3.23%)         | 11,837 (56.87%)    | 8,306 (39.90%)          |
|           | iCell        | 184,619 (18.62%)    | 671,946 (67.77%)   | <b>134,930 (13.61%)</b> |

Supplementary Table S3: **Numbers of unique and common edges between infected and control networks.** For the patient tissue and for each of the three cell lines (column 1) and for each molecular and iCell network (column 2), the table shows the number of unique edges in infected networks (column 3), the number of unique edges in control networks (column 4) and the number of edges common to infected and control networks (column 5).

| Cell line | Network type | #Unique to infected | #Unique to control | #Common        |
|-----------|--------------|---------------------|--------------------|----------------|
| A549      | PPI          | 139 (1.43%)         | 108 (1.11%)        | 9,484 (97.46%) |
|           | COEX         | 137 (1.46%)         | 104 (1.11%)        | 9,149 (97.43%) |
|           | GI           | 87 (1.23%)          | 89 (1.26%)         | 6,881 (97.51%) |
|           | iCell        | 139 (1.43%)         | 108 (1.11%)        | 9,484 (97.46%) |
| NHBE      | PPI          | 107 (1.11%)         | 247 (2.56%)        | 9,284 (96.33%) |
|           | COEX         | 104 (1.12%)         | 234 (2.51%)        | 8,970 (96.37%) |
|           | GI           | 70 (0.98%)          | 232 (3.24%)        | 6,863 (95.79%) |
|           | iCell        | 107 (1.11%)         | 247 (2.56%)        | 9,284 (96.33%) |
| CALU      | PPI          | 482 (5.0%)          | 197 (2.05%)        | 8952 (92.95%)  |
|           | COEX         | 471 (4.96%)         | 191 (2.01%)        | 8830 (93.03%)  |
|           | GI           | 574 (8.07%)         | 153 (2.15%)        | 6383 (89.77%)  |
|           | iCell        | 482 (5.0%)          | 197 (2.05%)        | 8952 (92.95%)  |
| Patient   | PPI          | 269 (2.74%)         | 3905 (39.76%)      | 5647 (57.5%)   |
|           | COEX         | 264 (2.73%)         | 3839 (39.64%)      | 5581 (57.63%)  |
|           | GI           | 180 (2.6%)          | 3176 (45.9%)       | 3563 (51.5%)   |
|           | iCell        | 269 (2.74%)         | 3905 (39.76%)      | 5647 (57.5%)   |

Supplementary Table S4: **Numbers of unique and common nodes between infected and control networks.** For each cell line and patient data (column 1) and for each network type (column 2), the table shows the number of unique nodes in infected networks (column 3), the number of unique nodes control networks (column 4) and the number of common nodes in control and infected networks (column 5).

| Cell line | A549 | NHBE | CALU | Patient |
|-----------|------|------|------|---------|
| A549      | 100  | 13   | 24   | 4       |
| NHBE      |      | 100  | 18   | 4       |
| CALU      |      |      | 100  | 11      |
| Patient   |      |      |      | 100     |

Supplementary Table S5: **The gene overlap between the top 100 most rewired genes of infected and control iCells in different data.** For the patient lung sample (denoted by “Patient”) and for each cell line (A549, NHBE, CALU), we compute the top 100 most rewired genes between infected and control iCells — the table shows the pairwise overlap between the top 100 most rewired genes among all the studied iCells.

| Gene      | Drug                 | Binding free energy<br>(kcal/mol) | Dissociation constant<br>(Molar) |
|-----------|----------------------|-----------------------------------|----------------------------------|
| ZNF35     | NADH                 | -9.8                              | $6.44 \times 10^{-8} \text{M}$   |
| RPSAP58   | NADH                 |                                   |                                  |
| ZNF562    | NADH                 | -9.4                              | $1.27 \times 10^{-7} \text{M}$   |
| OLFM2     | Fostamatinib         | -9.6                              | $9.02 \times 10^{-8} \text{M}$   |
| CYB561    | Zinc chloride        |                                   |                                  |
| ZNF41     | Fostamatinib         | -8.5                              | $5.79 \times 10^{-7} \text{M}$   |
| LCMT2     | N-Formylmethionine   |                                   |                                  |
| CSTF2T    | NADH                 | -10.8                             | $1.19 \times 10^{-8} \text{M}$   |
| NUP85     | Cladribine           | -7.2                              | $5.21 \times 10^{-6} \text{M}$   |
| REEP4     | Fostamatinib         | -9.3                              | $1.50 \times 10^{-7} \text{M}$   |
| ASRGL1    | NADH                 | -9.7                              | $7.62 \times 10^{-8} \text{M}$   |
| ZFP62     | Artenimol            | -7.6                              | $2.65 \times 10^{-6} \text{M}$   |
| CBX5      | Acetylsalicylic acid |                                   |                                  |
| KLHL9     | Artenimol            | -10.6                             | $1.67 \times 10^{-8} \text{M}$   |
| ZNF189    | Fostamatinib         | -9.9                              | $5.43 \times 10^{-8} \text{M}$   |
| ZNF597    | NADH                 | -10.8                             | $1.19 \times 10^{-8} \text{M}$   |
| HIST2H2AC | Artenimol            | -8.2                              | $9.61 \times 10^{-7} \text{M}$   |
| CSTF1     | Fostamatinib         | -13                               | $2.89 \times 10^{-10} \text{M}$  |
| ZNF507    | NADH                 | -8.6                              | $4.89 \times 10^{-7} \text{M}$   |
| ZNF286A   | NADH                 | -10.7                             | $1.41 \times 10^{-8} \text{M}$   |

Supplementary Table S6: **Binding affinities of the predicted DTIs.** For each of the top 20 most rewired genes in patient iCells of infected versus control (column 1), we report the potential drug for repurposing based on our framework (column 2). Finally, for each predicted DTI we report its binding free energy (column 3, in kcal/mol) computed using AutoDock Vina v1.2 and its corresponding dissociation constant,  $K_d$ , (column 4, in Molar). Note that we could not find an experimentally validated, or predicted protein structure for the RPSAP58 gene, so we could not perform the docking for it. Also, we excluded from the drugs the small chemical compounds (zinc chloride, n-formylmethionine and acetylsalicylic acid).
