# Supplementary material for: Integrated Data Analysis Uncovers New COVID-19 Related Genes and Potential Drug Re-Purposing Candidates
Source: Int J Mol Sci. 2023 Jan 11;24(2):1431. doi: 10.3390/ijms24021431 (PMC9863794; doi:10.3390/ijms24021431)
Supplement: Supplementary file 1 [file ijms-24-01431-s001.zip › S2 File-uniquely_enriched_annotations_infected_icells.xlsx]

## Sheet: GO BP terms
A549 infected unique GO BP terms	NHBE infected unique GO BP terms	CALU infected unique GO BP terms	Patient infected unique GO BP terms
GO:1905605	GO:0050847	GO:0033152	GO:1905602
GO:1905606	GO:0033157	GO:0035771	GO:0061737
GO:0033152	GO:0036089	GO:1905602	GO:0006900
GO:0051047	GO:0071045	GO:0006904	GO:1905597
GO:0006907	GO:0006777	GO:0032922	GO:1905596
GO:0007596	GO:0006907	GO:0030223	GO:2001135
GO:0030220	GO:0098779	GO:0009048	GO:0008063
GO:0051164	GO:0001501	GO:0009165	GO:0010040
GO:0001501	GO:0032924	GO:0014032	GO:1905599
GO:0048268	GO:0048260	GO:0032435	GO:0051047
GO:1905596	GO:0048261	GO:0065001	GO:0000165
GO:0048263	GO:0038202	GO:0030853	GO:1903070
GO:0048260	GO:0032020	GO:0007088	GO:0034516
GO:0070932	GO:0014032	GO:1904761	GO:1903265
GO:0006307	GO:0043200	GO:0051259	GO:0002827
GO:0090647	GO:0031453	GO:1903265	GO:0061014
GO:0006302	GO:0051493	GO:0035646	GO:0006289
GO:0006301	GO:0033233	GO:0018916	GO:0030299
GO:0035641	GO:0034605	GO:0006289	GO:0006833
GO:0018216	GO:0044794	GO:0034773	GO:0008360
GO:0051496	GO:0110061	GO:0050830	GO:0034776
GO:0033151	GO:0006285	GO:0050776	GO:0019532
GO:0051493	GO:0015844	GO:0097484	GO:2000120
GO:0006979	GO:1990138	GO:0046487	GO:0044351
GO:1900063	GO:0060548	GO:0070988	GO:0017186
GO:0048806	GO:0051291	GO:0010636	GO:0000715
GO:0006287	GO:1902410	GO:0042088	GO:1904582
GO:0051160	GO:1990869	GO:0043330	GO:0006376
GO:0015844	GO:0070988	GO:0010506	GO:0071407
GO:0006283	GO:0042327	GO:0048565	GO:1904996
GO:0060546	GO:0017186	GO:0032412	GO:0042692
GO:0006685	GO:0070987	GO:0090267	GO:0010575
GO:0006288	GO:0006376	GO:0051228	GO:0019322
GO:0030299	GO:0045821	GO:0030177	GO:0032412
GO:0050830	GO:1904996	GO:0090559	GO:0019085
GO:1904906	GO:1903898	GO:0071900	GO:0019087
GO:1905323	GO:0031943	GO:0071907	GO:0051584
GO:0097484	GO:0090263	GO:1905037	GO:0071907
GO:1903002	GO:0032792	GO:0070184	GO:0010866
GO:0019530	GO:0017004	GO:0000902	GO:2000392
GO:2000120	GO:1902894	GO:0042254	GO:0006884
GO:0019538	GO:0071902	GO:0042256	GO:0070189
GO:0001844	GO:0010863	GO:0043029	GO:0006886
GO:0010887	GO:1905035	GO:0045918	GO:0045919
GO:0051782	GO:0042554	GO:0002682	GO:0001680
GO:0010884	GO:0010040	GO:1900114	GO:0046856
GO:1902938	GO:2000016	GO:2000273	GO:2000406
GO:0045821	GO:0006114	GO:0072425	GO:0006119
GO:1904996	GO:0046856	GO:0032071	GO:2000273
GO:0006378	GO:0046855	GO:0032076	GO:2000378
GO:1904992	GO:0006111	GO:0009303	GO:0070169
GO:0021537	GO:1900112	GO:0038158	GO:0006627
GO:0060261	GO:0042823	GO:0007050	GO:0050796
GO:0006598	GO:0043149	GO:0007051	GO:0002521
GO:0090343	GO:0098609	GO:0032957	GO:0035306
GO:0032410	GO:0006625	GO:0032956	GO:0050713
GO:0090346	GO:0006621	GO:0072678	GO:0008154
GO:0048566	GO:0072675	GO:0033198	GO:0050715
GO:0032825	GO:2000780	GO:0016071	GO:0016077
GO:0006590	GO:0071277	GO:0050718	GO:0071347
GO:0019085	GO:0032956	GO:1901984	GO:0035865
GO:0019086	GO:0060760	GO:0050655	GO:0050655
GO:0003257	GO:0002523	GO:0015074	GO:0015074
GO:0014910	GO:0030579	GO:0033577	GO:0006694
GO:0090559	GO:0090297	GO:0032008	GO:0070561
GO:0051584	GO:0016077	GO:0006699	GO:2000650
GO:0010900	GO:0071345	GO:2000304	GO:0033617
GO:1904831	GO:0002353	GO:0098838	GO:1904491
GO:0071901	GO:0007212	GO:2001251	GO:0098736
GO:0010862	GO:0006029	GO:0000722	GO:0043248
GO:0032436	GO:0070291	GO:0071163	GO:0006464
GO:1905035	GO:1901291	GO:0033619	GO:0062176
GO:0035995	GO:0071586	GO:0072583	GO:0038083
GO:1990928	GO:0033617	GO:0097734	GO:0043488
GO:1905396	GO:2001269	GO:0038083	GO:0043484
GO:0048096	GO:0033209	GO:0043488	GO:0038089
GO:0006880	GO:0042177	GO:0033683	GO:0051725
GO:0042254	GO:0043248	GO:0034551	GO:0140199
GO:0018312	GO:0009395	GO:0000492	GO:0045629
GO:0097411	GO:0090042	GO:1904378	GO:0015677
GO:2000406	GO:0038083	GO:0051013	GO:0071880
GO:0046854	GO:1900029	GO:0007409	GO:0045625
GO:0032259	GO:0016557	GO:0045218	GO:0032675
GO:0006119	GO:0043484	GO:0051984	GO:0045627
GO:2000272	GO:0000492	GO:0006978	GO:0006874
GO:0070168	GO:0008285	GO:1902511	GO:0036414
GO:0048706	GO:0008286	GO:0002639	GO:1905671
GO:0006629	GO:0006878	GO:0044314	GO:0016322
GO:0009306	GO:0016320	GO:0006338	GO:0006975
GO:0006620	GO:0006977	GO:0006334	GO:0046883
GO:0009303	GO:0061740	GO:1901224	GO:0006970
GO:0007050	GO:0051987	GO:0046475	GO:0043921
GO:0072675	GO:0034329	GO:0042795	GO:0006979
GO:0009267	GO:1902513	GO:0042796	GO:0051983
GO:0060760	GO:0006336	GO:0042790	GO:1903852
GO:0035307	GO:0006337	GO:0043980	GO:0080111
GO:0030579	GO:0043982	GO:0035518	GO:0044319
GO:0030578	GO:1901639	GO:0045926	GO:1901639
GO:0050658	GO:0002084	GO:0031032	GO:0034383
GO:0090291	GO:0033198	GO:2000182	GO:0045920
GO:0050653	GO:0045920	GO:0035511	GO:0018101
GO:0050650	GO:0006898	GO:0060021	GO:0140300
GO:0050651	GO:0061684	GO:0042592	GO:0050891
GO:0072384	GO:0018101	GO:0002082	GO:0050901
GO:0090298	GO:0097191	GO:0010826	GO:0061045
GO:0071464	GO:0018108	GO:1901222	GO:0017038
GO:0006029	GO:0090051	GO:0010822	GO:0042322
GO:0070291	GO:0046203	GO:0035281	GO:0043065
GO:0035904	GO:1901224	GO:1904977	GO:1990542
GO:0006750	GO:1901223	GO:0070493	GO:0046688
GO:0071586	GO:2000060	GO:0055091	GO:0060501
GO:0006024	GO:0010822	GO:1904744	GO:1902172
GO:1902358	GO:0051299	GO:0006486	GO:0006468
GO:0051123	GO:0046208	GO:0071559	GO:0036413
GO:2001178	GO:0007274	GO:0032211	GO:1903078
GO:0048147	GO:0070493	GO:0045954	GO:0051965
GO:0090160	GO:0009826	GO:0097694	GO:0045086
GO:0048143	GO:0032218	GO:0045814	GO:0045081
GO:0071168	GO:0006488	GO:0045815	GO:0009223
GO:2001170	GO:2000058	GO:0043068	GO:0090314
GO:1903827	GO:0009447	GO:0006702	GO:0035469
GO:0039020	GO:0090090	GO:0045859	GO:0030101
GO:0038127	GO:0006468	GO:0045089	GO:0042509
GO:0061086	GO:0045088	GO:0019217	GO:0010596
GO:1904292	GO:1903070	GO:0090315	GO:0050995
GO:0051457	GO:0006464	GO:0070086	GO:0001837
GO:0048387	GO:0090314	GO:1990314	GO:0006066
GO:0048386	GO:0031047	GO:0060335	GO:0010751
GO:0043486	GO:1901315	GO:0010951	GO:0097340
GO:0048169	GO:0001837	GO:0051572	GO:1905323
GO:0045745	GO:0006066	GO:0002821	GO:0070232
GO:0034418	GO:0010757	GO:0051574	GO:0000082
GO:0002227	GO:0006417	GO:0035946	GO:0007161
GO:0009386	GO:0006415	GO:0010452	GO:0002456
GO:0008286	GO:0006068	GO:0001837	GO:0007007
GO:0055003	GO:0007160	GO:0006148	GO:0060158
GO:0006879	GO:1903673	GO:0006790	GO:0015760
GO:0006878	GO:0061428	GO:2000757	GO:0045785
GO:0015920	GO:0007006	GO:1903457	GO:0071727
GO:0055008	GO:0007004	GO:1902109	GO:0071726
GO:0006876	GO:0042446	GO:0032754	GO:0007368
GO:1905671	GO:0071681	GO:0034115	GO:0070849
GO:0050870	GO:0071727	GO:0033085	GO:0045661
GO:0051014	GO:0071726	GO:0009450	GO:0044090
GO:0046929	GO:0002265	GO:0009298	GO:0033036
GO:0006977	GO:0050725	GO:0002455	GO:0051057
GO:0044257	GO:0045664	GO:0072708	GO:0006935
GO:0006897	GO:0045666	GO:0046486	GO:0006936
GO:0030259	GO:1902959	GO:1902047	GO:0030219
GO:0044314	GO:0006660	GO:0030838	GO:1902553
GO:0046203	GO:0006661	GO:0045786	GO:0001516
GO:0006337	GO:2000234	GO:0052651	GO:0042998
GO:0043982	GO:2000233	GO:0006669	GO:2001020
GO:0018243	GO:0010523	GO:0060999	GO:0044860
GO:0018242	GO:1905205	GO:0045661	GO:0090675
GO:0046395	GO:0043966	GO:0001909	GO:0031668
GO:0046474	GO:0061709	GO:1901799	GO:0051461
GO:0043980	GO:0033148	GO:1902073	GO:0051464
GO:0035519	GO:0001516	GO:0060993	GO:0045104
GO:0032286	GO:0019827	GO:0070245	GO:0018206
GO:0045926	GO:0014029	GO:2000232	GO:0110076
GO:0031032	GO:1901673	GO:0006666	GO:1901077
GO:0060340	GO:1904751	GO:0010634	GO:0045840
GO:0046390	GO:0043627	GO:0098586	GO:0046716
GO:0031134	GO:0045715	GO:0006935	GO:0048024
GO:0097191	GO:0034314	GO:0043966	GO:1905337
GO:0042593	GO:0046718	GO:0043967	GO:0010628
GO:0001889	GO:0045843	GO:0043968	GO:0001765
GO:0006167	GO:0006296	GO:1902553	GO:0023035
GO:0060979	GO:0046712	GO:0042327	GO:0051029
GO:0061518	GO:0061001	GO:0042998	GO:0006809
GO:0008219	GO:1905337	GO:0001510	GO:0034612
GO:0051303	GO:0097498	GO:0042997	GO:0044267
GO:0046208	GO:0046326	GO:0036444	GO:0044344
GO:0030592	GO:0050829	GO:0044860	GO:0006569
GO:0072208	GO:1902425	GO:0000012	GO:0061099
GO:0006486	GO:0051186	GO:0014029	GO:0035767
GO:2000114	GO:0044262	GO:1901671	GO:0007187
GO:0006520	GO:0007189	GO:1900370	GO:0032819
GO:1990540	GO:0007183	GO:1904750	GO:0009888
GO:0043066	GO:0034612	GO:0016567	GO:0071872
GO:1903225	GO:1903401	GO:0016561	GO:0022898
GO:0042942	GO:1903400	GO:0016446	GO:0007229
GO:0097284	GO:0035385	GO:0018027	GO:0042267
GO:0043068	GO:0061723	GO:1903251	GO:0046390
GO:1900158	GO:0015822	GO:0046324	GO:0010712
GO:2000144	GO:0010916	GO:0045329	GO:0010710
GO:0006703	GO:0009223	GO:1902426	GO:0006513
GO:0006601	GO:0071870	GO:0051029	GO:0032715
GO:1902174	GO:0035019	GO:0015012	GO:0006103
GO:0030540	GO:0035549	GO:0001568	GO:0006108
GO:0007601	GO:1901215	GO:0044344	GO:0060193
GO:0060231	GO:0006893	GO:0044539	GO:0006636
GO:2000146	GO:0009952	GO:0006367	GO:0071480
GO:0032911	GO:0010719	GO:0007186	GO:0019674
GO:0045080	GO:1990809	GO:0014807	GO:1903974
GO:0090314	GO:0043981	GO:1903905	GO:0010216
GO:0060335	GO:0043984	GO:0090216	GO:0003309
GO:0046101	GO:0010710	GO:0060373	GO:0070286
GO:0071831	GO:0046827	GO:0090400	GO:0006749
GO:0071830	GO:0006515	GO:0097428	GO:0031397
GO:0035461	GO:2000369	GO:0043988	GO:0001780
GO:0051276	GO:0060193	GO:0009952	GO:0006743
GO:0010596	GO:0019677	GO:2000380	GO:0010764
GO:0009913	GO:0009311	GO:0036111	GO:0006740
GO:0071542	GO:0009313	GO:0043983	GO:2001181
GO:0090022	GO:0043406	GO:2000064	GO:1904466
GO:0001836	GO:0060612	GO:0036112	GO:1902031
GO:0001837	GO:0032880	GO:0006513	GO:0071395
GO:0030199	GO:0000414	GO:1990519	GO:0009408
GO:0045187	GO:0046007	GO:1900100	GO:0090135
GO:0010757	GO:0001946	GO:0035491	GO:2001247
GO:0019367	GO:0000963	GO:0033044	GO:0002548
GO:0006414	GO:0022618	GO:0006738	GO:0045214
GO:0006144	GO:0031398	GO:0006636	GO:1900037
GO:0006068	GO:2001244	GO:0019674	GO:0033690
GO:0032148	GO:0032400	GO:0070171	GO:0071651
GO:0034113	GO:0006742	GO:1901858	GO:0048738
GO:0034447	GO:0002028	GO:2000209	GO:1905413
GO:1902043	GO:2001181	GO:0000209	GO:0045616
GO:0002755	GO:0008033	GO:0050766	GO:0070374
GO:0000082	GO:0006749	GO:0071803	GO:2000562
GO:0000083	GO:0014068	GO:0000415	GO:0030322
GO:0007611	GO:0043277	GO:0060816	GO:0051384
GO:0042769	GO:0090136	GO:0090288	GO:0051382
GO:1903573	GO:0090135	GO:2000660	GO:0055010
GO:0042761	GO:0032581	GO:0002024	GO:0034333
GO:0016180	GO:0007030	GO:0000962	GO:1902463
GO:1905855	GO:0090035	GO:0000965	GO:0010664
GO:0030195	GO:0002542	GO:0031397	GO:0002726
GO:0052651	GO:0042493	GO:0006744	GO:0032911
GO:0050725	GO:0140112	GO:1990938	GO:1900244
GO:0006669	GO:0009060	GO:1902595	GO:0090141
GO:0045324	GO:0070373	GO:2001181	GO:0090144
GO:0045666	GO:2000562	GO:2000510	GO:1900082
GO:1902775	GO:0001938	GO:0021954	GO:0062099
GO:0048291	GO:0035751	GO:0043066	GO:0046629
GO:0009314	GO:0071072	GO:0010869	GO:0030187
GO:0060993	GO:0033135	GO:1904385	GO:0061136
GO:0070535	GO:1902463	GO:0070830	GO:1904960
GO:0070534	GO:0016236	GO:0140112	GO:0061033
GO:1902952	GO:0050860	GO:1904417	GO:1905062
GO:0043967	GO:0010664	GO:0070914	GO:0050918
GO:0043968	GO:0071257	GO:0045618	GO:0022008
GO:0061709	GO:0001525	GO:0033365	GO:0034058
GO:0031468	GO:0046599	GO:0035945	GO:0043547
GO:0046963	GO:0097753	GO:0070371	GO:0036159
GO:2001141	GO:0097202	GO:0051384	GO:0045409
GO:0051702	GO:0090149	GO:0051383	GO:0060537
GO:0032964	GO:0031532	GO:0030327	GO:0046697
GO:1900273	GO:1900242	GO:0043932	GO:0045806
GO:1900272	GO:0042780	GO:1902466	GO:0006397
GO:0000012	GO:1901142	GO:0046041	GO:2001235
GO:1903919	GO:1905274	GO:0010457	GO:0019221
GO:0039692	GO:1904706	GO:0046951	GO:0032434
GO:1905920	GO:0071624	GO:0006325	GO:0032929
GO:0045713	GO:0033627	GO:0030071	GO:0060712
GO:1904457	GO:0061036	GO:0018276	GO:0006475
GO:0016446	GO:1990575	GO:0099093	GO:0060326
GO:0006297	GO:0070488	GO:0016243	GO:0003341
GO:0016055	GO:0050919	GO:1904706	GO:0045055
GO:0043032	GO:0008340	GO:0071156	GO:0044154
GO:0046712	GO:0007265	GO:0071157	GO:0048863
GO:0006298	GO:0008612	GO:0046628	GO:0031116
GO:0006805	GO:0031990	GO:0018117	GO:0006114
GO:0046491	GO:0006556	GO:0097187	GO:0051208
GO:0048009	GO:0043545	GO:0031146	GO:0032729
GO:0001764	GO:0051923	GO:1905064	GO:0043124
GO:0046329	GO:0006390	GO:0070489	GO:0032722
GO:0051029	GO:0006391	GO:0002159	GO:0032655
GO:0086100	GO:0032024	GO:0002154	GO:0031581
GO:0072156	GO:0032430	GO:1905341	GO:0006601
GO:0007588	GO:0019732	GO:0086073	GO:0051091
GO:0036344	GO:0000245	GO:0002098	GO:1990748
GO:0006360	GO:0032926	GO:0006996	GO:0045187
GO:0006367	GO:0006470	GO:0031998	GO:0007173
GO:0006369	GO:0035372	GO:0036159	GO:0043433
GO:0007183	GO:0060242	GO:0097050	GO:0050731
GO:0007181	GO:0019254	GO:0033632	GO:0060395
GO:0048592	GO:0007266	GO:0008295	GO:0006820
GO:0009887	GO:0010968	GO:0045444	GO:0001913
GO:0032814	GO:0010965	GO:0006478	GO:0070509
GO:0032815	GO:0031115	GO:0032430	GO:1903140
GO:0050792	GO:0044154	GO:0000244	GO:0032532
GO:0050790	GO:0086010	GO:0000245	GO:0071449
GO:0017015	GO:0009966	GO:0019731	GO:0042495
GO:0009888	GO:0051260	GO:0032385	GO:1902548
GO:0090316	GO:0001822	GO:0006473	GO:0008272
GO:0060070	GO:0042532	GO:0090240	GO:0034379
GO:0035019	GO:0051958	GO:0031053	GO:0030208
GO:0035549	GO:0031119	GO:0035470	GO:0031340
GO:1901215	GO:0006171	GO:0000455	GO:0048245
GO:0061077	GO:0043122	GO:0003341	GO:0048246
GO:0046398	GO:0010729	GO:0002381	GO:0048247
GO:0034382	GO:0007096	GO:0051562	GO:0090068
GO:0043983	GO:0031589	GO:0051560	GO:0045116
GO:0007229	GO:0150003	GO:0044154	GO:0031670
GO:2000065	GO:0032653	GO:2000152	GO:1901660
GO:0009812	GO:2000251	GO:0048863	GO:0016574
GO:0010712	GO:0080009	GO:0010447	GO:0071660
GO:0032088	GO:0031581	GO:0032331	GO:0045721
GO:0032715	GO:0009446	GO:0051958	GO:0045722
GO:0006511	GO:0031274	GO:0022900	GO:1990440
GO:0014891	GO:0042752	GO:0032729	GO:0046709
GO:0097017	GO:0007031	GO:2000427	GO:0045879
GO:0006102	GO:0036475	GO:0072710	GO:0006953
GO:0051683	GO:0072659	GO:0072716	GO:0001678
GO:1900103	GO:0045022	GO:0032268	GO:0042304
GO:0043010	GO:0007179	GO:0072657	GO:0034651
GO:0051684	GO:0006081	GO:1990743	GO:0000738
GO:0070179	GO:0045792	GO:0072659	GO:0006218
GO:0070178	GO:0050731	GO:0032479	GO:0000737
GO:0006631	GO:0060395	GO:0001300	GO:1900625
GO:1902041	GO:0016052	GO:0071287	GO:0061086
GO:0006637	GO:0060391	GO:0045652	GO:1900747
GO:0071480	GO:0035928	GO:0060391	GO:0006351
GO:0033043	GO:0001915	GO:0035928	GO:1900748
GO:0032060	GO:0061436	GO:0071441	GO:0006954
GO:0009313	GO:2000630	GO:0098911	GO:0019064
GO:0043407	GO:0071219	GO:2000630	GO:0006432
GO:0043406	GO:0022604	GO:2000637	GO:0042448
GO:0019322	GO:1904322	GO:0002076	GO:0035435
GO:0007042	GO:0070830	GO:0043977	GO:0035025
GO:0070886	GO:0071108	GO:1904884	GO:1902992
GO:0019388	GO:2000811	GO:0046007	GO:0006968
GO:0032968	GO:0034983	GO:0009060	GO:0008543
GO:1902884	GO:0042989	GO:0090669	GO:0046777
GO:0043409	GO:0042984	GO:2000819	GO:0031281
GO:0010216	GO:0098696	GO:0097712	GO:0086004
GO:0071803	GO:0043542	GO:0016576	GO:0007252
GO:0071801	GO:0090068	GO:0016572	GO:0045345
GO:0003308	GO:0031571	GO:0048642	GO:2000344
GO:0090280	GO:0097527	GO:0016578	GO:0036120
GO:0016925	GO:0045054	GO:0045722	GO:1903249
GO:1901750	GO:0016574	GO:0018393	GO:0046833
GO:0003300	GO:0016573	GO:1904251	GO:1903243
GO:0051247	GO:0071218	GO:1905719	GO:0009249
GO:1902035	GO:0030878	GO:0012501	GO:0032506
GO:1902031	GO:0002803	GO:0006956	GO:0071493
GO:0031396	GO:0046709	GO:0042307	GO:0048333
GO:0031397	GO:0012501	GO:0048013	GO:0032509
GO:2001247	GO:0042307	GO:1900182	GO:0060213
GO:0006744	GO:0030279	GO:0007422	GO:0007339
GO:2001241	GO:0070966	GO:0034975	GO:0071799
GO:0002028	GO:0001574	GO:0043315	GO:0001956
GO:0006740	GO:1903527	GO:0006210	GO:0071404
GO:0044828	GO:0001578	GO:0090615	GO:2000675
GO:0006310	GO:0031401	GO:0061087	GO:2000778
GO:2001186	GO:1900210	GO:0061086	GO:0002032
GO:0006749	GO:0007190	GO:0006356	GO:2000774
GO:0032613	GO:0038027	GO:0015760	GO:1903020
GO:0070301	GO:0000186	GO:0031937	GO:0009435
GO:0072593	GO:0052651	GO:0006431	GO:0030837
GO:0009725	GO:1902992	GO:0090207	GO:0045019
GO:0010762	GO:0051384	GO:0070895	GO:0032691
GO:2000669	GO:1904816	GO:0035025	GO:1901385
GO:0009408	GO:0046777	GO:0045582	GO:1901841
GO:0014066	GO:0071962	GO:1904959	GO:1901844
GO:0000294	GO:0043616	GO:0003382	GO:0046426
GO:0070836	GO:0048012	GO:0003383	GO:0046427
GO:0033692	GO:0007253	GO:0042573	GO:0033129
GO:0048739	GO:0043161	GO:0045345	GO:0008053
GO:0070914	GO:2000098	GO:0036124	GO:1905581
GO:0045618	GO:0060441	GO:0043161	GO:0036316
GO:0045617	GO:0006505	GO:0045348	GO:0036315
GO:0071897	GO:0046832	GO:0042371	GO:0031529
GO:0035752	GO:1903984	GO:0046834	GO:0097213
GO:0006968	GO:0006508	GO:0034968	GO:0097749
GO:0030324	GO:0010992	GO:0010994	GO:0051482
GO:0050868	GO:0006646	GO:0070234	GO:0006027
GO:0030327	GO:0033137	GO:0009234	GO:0035066
GO:0030241	GO:0032506	GO:0051697	GO:0060559
GO:0030240	GO:0071493	GO:1902775	GO:0052362
GO:0050860	GO:0048333	GO:0009249	GO:0061436
GO:0034334	GO:0014902	GO:0032970	GO:0006825
GO:0010667	GO:0060741	GO:0098532	GO:0051893
GO:0060999	GO:0071799	GO:2000353	GO:0032802
GO:0051639	GO:1903691	GO:0031293	GO:0000079
GO:0042984	GO:0035329	GO:2000105	GO:0010871
GO:0051148	GO:0050748	GO:1901331	GO:0051797
GO:0036302	GO:2000182	GO:0071364	GO:0051790
GO:0002726	GO:0050679	GO:0071816	GO:0019068
GO:0048246	GO:0015884	GO:1901726	GO:0051792
GO:0048048	GO:0031297	GO:0001955	GO:0043011
GO:0046599	GO:0001954	GO:0086091	GO:2000481
GO:1903841	GO:0001953	GO:0031295	GO:0060252
GO:0097201	GO:2001271	GO:0032570	GO:0000463
GO:0150093	GO:0006004	GO:0000958	GO:0000466
GO:1900244	GO:2000777	GO:0048208	GO:0003356
GO:0090141	GO:1903025	GO:0042119	GO:0051599
GO:0090144	GO:0048208	GO:0071383	GO:0044147
GO:0071158	GO:0110155	GO:0072720	GO:0072321
GO:0071629	GO:0071380	GO:0009437	GO:0051216
GO:0048769	GO:0016139	GO:2000696	GO:0060045
GO:0043583	GO:0006690	GO:0007023	GO:0051354
GO:0018272	GO:0007029	GO:0070827	GO:0010734
GO:0030198	GO:0045765	GO:0007029	GO:0003400
GO:0006062	GO:0045766	GO:0045765	GO:0032735
GO:0042789	GO:0045603	GO:0090383	GO:1903377
GO:1904706	GO:1901029	GO:1901029	GO:1903799
GO:0043588	GO:0050852	GO:0030997	GO:0032946
GO:0046628	GO:0030334	GO:0007588	GO:0031365
GO:1904469	GO:0097201	GO:0050859	GO:0035313
GO:0072235	GO:0007584	GO:0046051	GO:0032490
GO:0030183	GO:0032008	GO:0006913	GO:0043420
GO:0015866	GO:0046057	GO:2000655	GO:0106074
GO:0015867	GO:0006913	GO:0051170	GO:0071356
GO:0035502	GO:0034340	GO:1905581	GO:0000387
GO:0061036	GO:1902570	GO:2000827	GO:0019432
GO:0035115	GO:0031442	GO:0051592	GO:0001960
GO:0002842	GO:0051726	GO:0006313	GO:0090494
GO:1905344	GO:0030900	GO:0046121	GO:0046015
GO:0050918	GO:1905572	GO:0030502	GO:0051135
GO:1905167	GO:1905908	GO:2000653	GO:0030890
GO:0002152	GO:0050688	GO:0007094	GO:0046010
GO:0046514	GO:0031116	GO:0046513	GO:0034144
GO:1904684	GO:0050684	GO:0046458	GO:0048251
GO:0002098	GO:0008584	GO:0031116	GO:0043393
GO:1901726	GO:0051898	GO:2000291	GO:0000288
GO:0032204	GO:0050920	GO:2001141	GO:0019805
GO:2000397	GO:0051895	GO:0010801	GO:0007113
GO:0051923	GO:2000134	GO:0051281	GO:2000008
GO:0097114	GO:0010606	GO:0008277	GO:0090118
GO:1902109	GO:0006432	GO:2000805	GO:0071674
GO:0033962	GO:0009611	GO:0051896	GO:0071677
GO:0006256	GO:0010890	GO:0032232	GO:0001738
GO:0035136	GO:0010466	GO:2000134	GO:0071672
GO:0045807	GO:0043323	GO:0010606	GO:0006383
GO:0045806	GO:0051085	GO:0001580	GO:0016310
GO:0035567	GO:0034382	GO:0010890	GO:0048026
GO:2000325	GO:0006449	GO:0035723	GO:0043491
GO:1903061	GO:2000483	GO:0035435	GO:0030220
GO:0032431	GO:0035791	GO:0051793	GO:0034645
GO:0019732	GO:0060702	GO:2000097	GO:0034316
GO:0034115	GO:1904828	GO:2000727	GO:0009650
GO:0006779	GO:1901143	GO:0032930	GO:0009651
GO:0060327	GO:0030042	GO:2000480	GO:0033280
GO:0060326	GO:0007205	GO:2000481	GO:1903905
GO:1902894	GO:0035729	GO:0006446	GO:0000726
GO:1901856	GO:0030193	GO:2000098	GO:0044458
GO:0045987	GO:1903371	GO:0060702	GO:0018171
GO:0044154	GO:0030194	GO:0031064	GO:0006120
GO:1905832	GO:0045199	GO:0035407	GO:0032740
GO:0007218	GO:0045198	GO:0120049	GO:0042532
GO:0043570	GO:0036509	GO:0051591	GO:1905166
GO:0001829	GO:0070213	GO:0030163	GO:0008206
GO:0043653	GO:0071236	GO:0030518	GO:0150111
GO:0010821	GO:0000226	GO:1901373	GO:0010838
GO:0034446	GO:1990755	GO:0010875	GO:0032342
GO:0043654	GO:0106077	GO:0006048	GO:0045356
GO:0051209	GO:0016042	GO:0045581	GO:0045359
GO:0031119	GO:0065003	GO:0010469	GO:0009725
GO:0010729	GO:0015790	GO:2000562	GO:0036035
GO:0048762	GO:2000649	GO:0006044	GO:0051901
GO:0150003	GO:2000646	GO:0010468	GO:0006533
GO:1901888	GO:0006689	GO:0010735	GO:0030155
GO:2000250	GO:1902010	GO:0036509	GO:1903237
GO:0009447	GO:1901796	GO:0006613	GO:0045860
GO:0009446	GO:1902202	GO:0090181	GO:1990573
GO:0072717	GO:0008625	GO:1990758	GO:1904894
GO:0009443	GO:0043392	GO:0019933	GO:0000187
GO:0045184	GO:1901980	GO:1990755	GO:0000183
GO:0043536	GO:0042633	GO:0050709	GO:0006650
GO:0072219	GO:0048259	GO:0045648	GO:0032909
GO:0060143	GO:0043252	GO:0065003	GO:1902187
GO:0007179	GO:0042060	GO:0006680	GO:2000349
GO:0006081	GO:0140058	GO:0006685	GO:0090303
GO:0045910	GO:1900425	GO:0070100	GO:0010942
GO:0002503	GO:0030948	GO:0035196	GO:1901303
GO:0050730	GO:0045040	GO:0009154	GO:0070555
GO:0045652	GO:0106101	GO:1902035	GO:0070862
GO:1904380	GO:0030866	GO:0008156	GO:0006012
GO:0060391	GO:0045047	GO:1901980	GO:0010463
GO:0045656	GO:0045046	GO:0048254	GO:0019371
GO:0015012	GO:0045736	GO:0045165	GO:0071236
GO:0015014	GO:0071672	GO:0030951	GO:0048662
GO:0060828	GO:0071773	GO:0030949	GO:0048661
GO:0043977	GO:0006282	GO:0042738	GO:0007346
GO:0042391	GO:0033119	GO:0052746	GO:0051402
GO:0034375	GO:0034087	GO:0045736	GO:0051403
GO:0043972	GO:0015937	GO:0051085	GO:0050870
GO:1902230	GO:0016310	GO:1990481	GO:0060124
GO:0034379	GO:0007267	GO:0045630	GO:2001286
GO:0043382	GO:0046067	GO:0034728	GO:0030730
GO:2000810	GO:0034316	GO:0030308	GO:0060741
GO:0042989	GO:0048024	GO:0015937	GO:1902806
GO:0048245	GO:1902527	GO:0030307	GO:0045672
GO:0042158	GO:2000406	GO:0006864	GO:0002250
GO:0042981	GO:0046834	GO:0023057	GO:0098656
GO:0032924	GO:0042921	GO:0051001	GO:2000588
GO:0015908	GO:0000045	GO:0043086	GO:1990966
GO:0043542	GO:0046784	GO:1902527
GO:0045112	GO:1900221	GO:0070970
GO:0007100	GO:1900222	GO:0000720
GO:0007007	GO:1900223	GO:0006343
GO:0090063	GO:0022612	GO:0000729
GO:0019369	GO:0031175	GO:0046785
GO:1900363	GO:0008380	GO:0006241
GO:0031579	GO:0022615	GO:0044458
GO:0016575	GO:1905224	GO:0046167
GO:0016577	GO:1905168	GO:0046166
GO:0007612	GO:0060050	GO:1905165
GO:0033700	GO:0031929	GO:0015804
GO:1903060	GO:0031146	GO:0046602
GO:0061564	GO:0060054	GO:0060562
GO:0018424	GO:0045893	GO:1905869
GO:0006812	GO:0006616	GO:0008206
GO:0045947	GO:0045453	GO:0051315
GO:0023021	GO:0006654	GO:0010839
GO:0001774	GO:0097039	GO:0051091
GO:0006956	GO:0007568	GO:0002227
GO:0030277	GO:0001714	GO:0051097
GO:0048010	GO:0045292	GO:0007569
GO:0042304	GO:0030308	GO:2000048
GO:0036353	GO:0045943	GO:0006556
GO:0036352	GO:0070676	GO:0045945
GO:0036351	GO:0061188	GO:0140361
GO:0070613	GO:0045948	GO:0045861
GO:0007422	GO:0051919	GO:1903232
GO:2000360	GO:0006655	GO:0005981
GO:0000731	GO:1902065	GO:0006654
GO:0036295	GO:0006656	GO:0000183
GO:0006355	GO:1903690	GO:2000617
GO:0060413	GO:0006650	GO:2000619
GO:0006353	GO:0032049	GO:0032049
GO:0007193	GO:2000348	GO:0009235
GO:0032006	GO:0006659	GO:0090307
GO:0044524	GO:0006713	GO:0044774
GO:0061088	GO:0035459	GO:0070458
GO:0032770	GO:0035458	GO:0051260
GO:0032802	GO:0090303	GO:1903580
GO:0019065	GO:0071787	GO:0019276
GO:0010923	GO:0010944	GO:0010744
GO:1903438	GO:1901307	GO:2000761
GO:0002265	GO:0010518	GO:1903426
GO:0010842	GO:2000291	GO:0006406
GO:0016239	GO:0051548	GO:1904447
GO:0046677	GO:1903508	GO:0034421
GO:0045585	GO:1903428	GO:0034454
GO:1902998	GO:0006400	GO:0042102
GO:0042573	GO:0019377	GO:0072739
GO:0046777	GO:0006404	GO:0043517
GO:0030325	GO:0006405	GO:1904042
GO:2000617	GO:0006406	GO:0007010
GO:0007250	GO:1904447	GO:0031098
GO:0032375	GO:0071230	GO:0032873
GO:0051086	GO:0021759	GO:0090399
GO:0032909	GO:0048661	GO:0045579
GO:0046835	GO:0042776	GO:0071300
GO:0046836	GO:0051181	GO:0070528
GO:0006505	GO:0048699	GO:0033344
GO:0097530	GO:0007010	GO:0098792
GO:1990569	GO:0007399	GO:1901838
GO:0060562	GO:0090399	GO:0098656
GO:0051693	GO:0035821	GO:1902741
GO:2000368	GO:1902807
GO:0097028	GO:1901838
GO:0070681	GO:0045671
GO:0060628	GO:1902741
GO:0050713	GO:0001934
GO:0032506
GO:0006641
GO:1903052
GO:0070145
GO:0032509
GO:0032743
GO:0007339
GO:0016488
GO:0106049
GO:0035329
GO:0072006
GO:0061615
GO:0090502
GO:0034625
GO:0048839
GO:0050679
GO:0050773
GO:0071360
GO:0015884
GO:0015886
GO:0001953
GO:0030497
GO:0010571
GO:0071560
GO:0032570
GO:1903241
GO:0071347
GO:0042987
GO:1902275
GO:0034505
GO:0050718
GO:0042118
GO:0042113
GO:0098711
GO:0006210
GO:0009437
GO:0003130
GO:0043504
GO:2000696
GO:0045016
GO:0030837
GO:1901532
GO:0010564
GO:0030217
GO:0045765
GO:0002244
GO:0032691
GO:0015695
GO:0001649
GO:0034369
GO:0046951
GO:0002327
GO:0030336
GO:0030997
GO:0061441
GO:0001937
GO:0006914
GO:0046057
GO:1905618
GO:0008053
GO:0009890
GO:0051170
GO:0034227
GO:0006751
GO:2000822
GO:0036316
GO:0036315
GO:0039532
GO:0051489
GO:0097213
GO:0097746
GO:1904283
GO:0071638
GO:1905273
GO:1905906
GO:1905907
GO:1904778
GO:0007095
GO:1905908
GO:0046512
GO:0046458
GO:0045905
GO:0031113
GO:0050684
GO:0030422
GO:0006820
GO:0006826
GO:0050922
GO:0006828
GO:0061028
GO:0034763
GO:0010603
GO:0019509
GO:2000270
GO:0043048
GO:0035565
GO:0043044
GO:0007519
GO:0009611
GO:0018192
GO:0045833
GO:0006261
GO:0035581
GO:0010875
GO:0048008
GO:2000726
GO:2000480
GO:0097080
GO:0031064
GO:0046121
GO:0060317
GO:0010977
GO:0000466
GO:0010873
GO:0040037
GO:0030512
GO:0061157
GO:0061156
GO:0070584
GO:0045410
GO:0071910
GO:0051835
GO:0007202
GO:0007205
GO:0043647
GO:0010734
GO:0000463
GO:0043039
GO:0019343
GO:0098815
GO:0019439
GO:0060412
GO:2000008
GO:0018126
GO:1902995
GO:1903977
GO:2000546
GO:0032640
GO:0036508
GO:0036509
GO:0038061
GO:0006552
GO:0070212
GO:0070213
GO:0019934
GO:0002922
GO:0042744
GO:0042178
GO:0007064
GO:0032496
GO:0032497
GO:0070862
GO:0035315
GO:0106074
GO:0010848
GO:0015909
GO:0030193
GO:0019346
GO:0003323
GO:0060389
GO:0071353
GO:0065002
GO:0006680
GO:0051865
GO:0015790
GO:0043243
GO:1901800
GO:0003407
GO:0002040
GO:0002368
GO:0002042
GO:0033600
GO:0033601
GO:1905895
GO:0006164
GO:1905890
GO:0042063
GO:1905892
GO:0010815
GO:0044806
GO:0032735
GO:0048251
GO:0036211
GO:0044803
GO:0042148
GO:0043254
GO:0014005
GO:0051444
GO:0042733
GO:0038092
GO:0045453
GO:0043981
GO:0043491
GO:0052746
GO:0015692
GO:0045732
GO:0046370
GO:0032733
GO:0030194
GO:0097435
GO:0034728
GO:0034729
GO:0050808
GO:0043697
GO:0050801
GO:0043691
GO:0007267
GO:0051006
GO:0051000
GO:0046067
GO:0048024
GO:0043085
GO:0007417
GO:0036289
GO:1903906
GO:1901874
GO:1903903
GO:0007263
GO:0047496
GO:1903909
GO:0006344
GO:1900155
GO:0046786
GO:0045671
GO:0034314
GO:1900221
GO:1900222
GO:0046466
GO:0120094
GO:0017038
GO:0031929
GO:1905166
GO:0060054
GO:0045597
GO:0045596
GO:0045595
GO:0060586
GO:0010832
GO:0010994
GO:0086010
GO:0070131
GO:0060561
GO:0045599
GO:0008203
GO:0006084
GO:0097039
GO:0032268
GO:0051096
GO:0032348
GO:2000049
GO:0007249
GO:0035246
GO:0072214
GO:0006534
GO:0006536
GO:0045943
GO:0030099
GO:0045862
GO:0045861
GO:1903232
GO:0006655
GO:0032042
GO:0006651
GO:2001214
GO:1902188
GO:0032201
GO:0006659
GO:0006713
GO:0090305
GO:0010942
GO:0072075
GO:0042535
GO:0042424
GO:0035457
GO:0001714
GO:0006398
GO:1901307
GO:0015809
GO:1901303
GO:0070555
GO:0048333
GO:0019276
GO:0010467
GO:0010744
GO:2000767
GO:0010469
GO:0009987
GO:0048662
GO:0097113
GO:0042100
GO:0042102
GO:0051402
GO:2000344
GO:0043518
GO:0090557
GO:0007155
GO:1990000
GO:0060644
GO:0070857
GO:0042472
GO:0007399
GO:0045778
GO:0090399
GO:1905860
GO:0032680
GO:0033344
GO:0045672
GO:0120183
GO:0048286
GO:1902847
GO:1990966
GO:1902808

## Sheet: RP terms
A549 infected unique RP terms	NHBE infected unique RP terms	CALU infected unique RP terms	Patient infected unique RP terms
R-HSA-170822	R-HSA-9020956	R-HSA-176408	R-HSA-6783984
R-HSA-5621480	R-HSA-9634600	R-HSA-8849469	R-HSA-8857538
R-HSA-9634600	R-HSA-8849469	R-HSA-1855167	R-HSA-8941855
R-HSA-6811438	R-HSA-1971475	R-HSA-3656253	R-HSA-9639288
R-HSA-180292	R-HSA-9634635	R-HSA-5602498	R-HSA-159418
R-HSA-5654219	R-HSA-6783984	R-HSA-211976	R-HSA-170670
R-HSA-5578999	R-HSA-5467337	R-HSA-3359473	R-HSA-1834941
R-HSA-5619060	R-HSA-8941855	R-HSA-9665250	R-HSA-72200
R-HSA-446199	R-HSA-500753	R-HSA-9665247	R-HSA-9615710
R-HSA-8857538	R-HSA-167290	R-HSA-179409	R-HSA-9018679
R-HSA-8941855	R-HSA-442380	R-HSA-2023837	R-HSA-420597
R-HSA-4793950	R-HSA-9634638	R-HSA-6806942	R-HSA-6806942
R-HSA-5619049	R-HSA-8853884	R-HSA-191650	R-HSA-8849468
R-HSA-4655427	R-HSA-5365859	R-HSA-2022928	R-HSA-428540
R-HSA-159418	R-HSA-5654693	R-HSA-162592	R-HSA-162592
R-HSA-8941333	R-HSA-186763	R-HSA-1253288	R-HSA-425397
R-HSA-6791055	R-HSA-6785470	R-HSA-175474	R-HSA-211958
R-HSA-2142691	R-HSA-5654719	R-HSA-5669034	R-HSA-918233
R-HSA-4085377	R-HSA-4655427	R-HSA-112043	R-HSA-5620916
R-HSA-5619048	R-HSA-1482801	R-HSA-174362	R-HSA-8964539
R-HSA-6803211	R-HSA-8856825	R-HSA-174577	R-HSA-8939242
R-HSA-983712	R-HSA-2162123	R-HSA-9031528	R-HSA-112043
R-HSA-5603027	R-HSA-9649913	R-HSA-912526	R-HSA-70221
R-HSA-76071	R-HSA-180897	R-HSA-5675482	R-HSA-2514859
R-HSA-5632927	R-HSA-9632700	R-HSA-6798163	R-HSA-180689
R-HSA-9615710	R-HSA-425986	R-HSA-373753	R-HSA-373753
R-HSA-70268	R-HSA-193634	R-HSA-5637810	R-HSA-450341
R-HSA-1474244	R-HSA-5603027	R-HSA-141405	R-HSA-9027604
R-HSA-111464	R-HSA-1834941	R-HSA-166058	R-HSA-1502540
R-HSA-73780	R-HSA-2468052	R-HSA-1306955	R-HSA-1461973
R-HSA-71336	R-HSA-167243	R-HSA-9014325	R-HSA-177504
R-HSA-1482922	R-HSA-6806942	R-HSA-4419969	R-HSA-9620244
R-HSA-211916	R-HSA-6788467	R-HSA-416476	R-HSA-844615
R-HSA-9022692	R-HSA-5654699	R-HSA-2022870	R-HSA-8952158
R-HSA-4720475	R-HSA-5140745	R-HSA-209543	R-HSA-399954
R-HSA-918233	R-HSA-191650	R-HSA-9636249	R-HSA-1237112
R-HSA-749476	R-HSA-6804760	R-HSA-8951430	R-HSA-2025928
R-HSA-5635838	R-HSA-5660862	R-HSA-162658	R-HSA-9012546
R-HSA-1475029	R-HSA-202670	R-HSA-176412	R-HSA-5218920
R-HSA-3065676	R-HSA-388841	R-HSA-4043911	R-HSA-5576886
R-HSA-1839122	R-HSA-163767	R-HSA-375276	R-HSA-264870
R-HSA-5675482	R-HSA-73780	R-HSA-5654733	R-HSA-264876
R-HSA-5684264	R-HSA-69200	R-HSA-399956	R-HSA-373076
R-HSA-112126	R-HSA-2892247	R-HSA-8876493	R-HSA-5576893
R-HSA-166058	R-HSA-74751	R-HSA-4411364	R-HSA-71064
R-HSA-2978092	R-HSA-71336	R-HSA-5619061	R-HSA-6785631
R-HSA-6807505	R-HSA-8985801	R-HSA-1963642	R-HSA-8963693
R-HSA-3065678	R-HSA-5358747	R-HSA-877312	R-HSA-434316
R-HSA-77305	R-HSA-191859	R-HSA-3785653	R-HSA-5357956
R-HSA-209543	R-HSA-9009391	R-HSA-5686938	R-HSA-1236394
R-HSA-201681	R-HSA-6807004	R-HSA-5654727	R-HSA-383280
R-HSA-917937	R-HSA-9607240	R-HSA-9665244	R-HSA-5683826
R-HSA-3656532	R-HSA-114508	R-HSA-1227986	R-HSA-390696
R-HSA-1502540	R-HSA-179812	R-HSA-420029	R-HSA-75094
R-HSA-8951430	R-HSA-749476	R-HSA-2682334	R-HSA-211979
R-HSA-159763	R-HSA-111932	R-HSA-937042	R-HSA-418597
R-HSA-446388	R-HSA-5674499	R-HSA-176417	R-HSA-168638
R-HSA-5603029	R-HSA-9013957	R-HSA-141430	R-HSA-9025094
R-HSA-168276	R-HSA-456926	R-HSA-166016	R-HSA-432040
R-HSA-190370	R-HSA-912526	R-HSA-9665348	R-HSA-164940
R-HSA-1257604	R-HSA-9033807	R-HSA-9645722	R-HSA-1655829
R-HSA-76061	R-HSA-198753	R-HSA-434316	R-HSA-193775
R-HSA-379397	R-HSA-8937144	R-HSA-1592389	R-HSA-75105
R-HSA-399954	R-HSA-5601884	R-HSA-5083628	R-HSA-111458
R-HSA-4755510	R-HSA-163282	R-HSA-2644607	R-HSA-1181150
R-HSA-4411364	R-HSA-5684264	R-HSA-1236382	R-HSA-5576890
R-HSA-2022377	R-HSA-964975	R-HSA-5357956	R-HSA-5083632
R-HSA-190373	R-HSA-389357	R-HSA-8852405	R-HSA-9664535
R-HSA-917977	R-HSA-109704	R-HSA-351906	R-HSA-5357905
R-HSA-8863795	R-HSA-167152	R-HSA-156588	R-HSA-844456
R-HSA-8853659	R-HSA-5654712	R-HSA-5654732	R-HSA-163841
R-HSA-1482798	R-HSA-416476	R-HSA-3134975	R-HSA-381070
R-HSA-5218920	R-HSA-8986944	R-HSA-5696394	R-HSA-8949215
R-HSA-1227986	R-HSA-416572	R-HSA-5668599	R-HSA-171319
R-HSA-9636003	R-HSA-5654689	R-HSA-9645460	R-HSA-2730905
R-HSA-168325	R-HSA-3299685	R-HSA-173623	R-HSA-193807
R-HSA-2161541	R-HSA-209543	R-HSA-5340588	R-HSA-445989
R-HSA-426117	R-HSA-5579026	R-HSA-8849932	R-HSA-933541
R-HSA-8878166	R-HSA-1502540	R-HSA-2024101	R-HSA-5083636
R-HSA-189451	R-HSA-9014826	R-HSA-937041	R-HSA-1461957
R-HSA-5083628	R-HSA-180024	R-HSA-3656237	R-HSA-446343
R-HSA-5357956	R-HSA-159763	R-HSA-5621575	R-HSA-168275
R-HSA-162599	R-HSA-5603029	R-HSA-3359474	R-HSA-8866907
R-HSA-5609977	R-HSA-5654733	R-HSA-9665246	R-HSA-168179
R-HSA-141334	R-HSA-9617828	R-HSA-9665249	R-HSA-2453902
R-HSA-168271	R-HSA-9020558	R-HSA-74259	R-HSA-192905
R-HSA-1222556	R-HSA-379397	R-HSA-5357905	R-HSA-977068
R-HSA-5619107	R-HSA-399954	R-HSA-111448	R-HSA-1614558
R-HSA-8939246	R-HSA-2559584	R-HSA-2465910	R-HSA-5607763
R-HSA-3301854	R-HSA-5654710	R-HSA-936837	R-HSA-2871796
R-HSA-5674400	R-HSA-167287	R-HSA-1632852	R-HSA-417957
R-HSA-4085011	R-HSA-9027284	R-HSA-6811440	R-HSA-399955
R-HSA-159740	R-HSA-389513	R-HSA-9013973	R-HSA-168188
R-HSA-1834949	R-HSA-167246	R-HSA-3928663	R-HSA-416700
R-HSA-180910	R-HSA-400206	R-HSA-8847993	R-HSA-168181
R-HSA-379398	R-HSA-180336	R-HSA-211981	R-HSA-164843
R-HSA-2892245	R-HSA-9630794	R-HSA-3229133	R-HSA-9619229
R-HSA-5661270	R-HSA-5358749	R-HSA-9664873	R-HSA-3899300
R-HSA-3232142	R-HSA-2586552	R-HSA-5673001	R-HSA-3322077
R-HSA-162588	R-HSA-3232118	R-HSA-9664565	R-HSA-8939211
R-HSA-381753	R-HSA-5654727	R-HSA-168179	R-HSA-1237044
R-HSA-390696	R-HSA-8875513	R-HSA-2453902	R-HSA-391160
R-HSA-373760	R-HSA-8876198	R-HSA-5654726	R-HSA-211935
R-HSA-917729	R-HSA-209563	R-HSA-166663	R-HSA-399997
R-HSA-73980	R-HSA-4570571	R-HSA-2028269	R-HSA-8854521
R-HSA-5683371	R-HSA-391906	R-HSA-9665251	R-HSA-1296053
R-HSA-373080	R-HSA-167242	R-HSA-4549349	R-HSA-9018677
R-HSA-193692	R-HSA-2470946	R-HSA-4793954	R-HSA-5336415
R-HSA-168638	R-HSA-2173796	R-HSA-975110
R-HSA-389542	R-HSA-8983432	R-HSA-2871796
R-HSA-203615	R-HSA-5218900	R-HSA-447043
R-HSA-70370	R-HSA-8866906	R-HSA-399955
R-HSA-110362	R-HSA-264870	R-HSA-8853333
R-HSA-3359471	R-HSA-389887	R-HSA-1358803
R-HSA-432722	R-HSA-432142	R-HSA-9010642
R-HSA-5340588	R-HSA-5654706	R-HSA-975163
R-HSA-168333	R-HSA-8984722	R-HSA-9632974
R-HSA-6796648	R-HSA-8985947	R-HSA-168188
R-HSA-5689896	R-HSA-8851708	R-HSA-9614399
R-HSA-77387	R-HSA-9645722	R-HSA-5205685
R-HSA-937041	R-HSA-5654688	R-HSA-175567
R-HSA-165054	R-HSA-6785631	R-HSA-975144
R-HSA-1181150	R-HSA-6787450	R-HSA-174490
R-HSA-5173105	R-HSA-69541	R-HSA-9665233
R-HSA-159782	R-HSA-5357956	R-HSA-9636569
R-HSA-198323	R-HSA-5625970	R-HSA-4641265
R-HSA-5357786	R-HSA-112412	R-HSA-174048
R-HSA-74259	R-HSA-912631	R-HSA-177539
R-HSA-5357905	R-HSA-201688	R-HSA-3322077
R-HSA-71384	R-HSA-167158	R-HSA-6803544
R-HSA-450302	R-HSA-383280	R-HSA-8939211
R-HSA-9615933	R-HSA-442982	R-HSA-6804114
R-HSA-163125	R-HSA-3769402	R-HSA-430116
R-HSA-210745	R-HSA-209560	R-HSA-9665245
R-HSA-3000480	R-HSA-5358751	R-HSA-9652282
R-HSA-1474151	R-HSA-2428933	R-HSA-2691232
R-HSA-936837	R-HSA-163685	R-HSA-937039
R-HSA-1632852	R-HSA-159740	R-HSA-111471
R-HSA-76066	R-HSA-1834949	R-HSA-68881
R-HSA-2168880	R-HSA-5654704	R-HSA-176409
R-HSA-211897	R-HSA-5674404	R-HSA-205043
R-HSA-2408508	R-HSA-9028731	R-HSA-9665737
R-HSA-1663150	R-HSA-9665686	R-HSA-168927
R-HSA-9037629	R-HSA-2892245	R-HSA-450321
R-HSA-111463	R-HSA-8849474	R-HSA-9031525
R-HSA-351200	R-HSA-5358752	R-HSA-4085001
R-HSA-450520	R-HSA-373760	R-HSA-9637628
R-HSA-1483248	R-HSA-73980
R-HSA-933541	R-HSA-5654732
R-HSA-163754	R-HSA-75158
R-HSA-1483213	R-HSA-196843
R-HSA-8849473	R-HSA-426496
R-HSA-9664873	R-HSA-1855204
R-HSA-1296072	R-HSA-203615
R-HSA-194313	R-HSA-442729
R-HSA-3304356	R-HSA-1250196
R-HSA-9660826	R-HSA-173623
R-HSA-352238	R-HSA-445144
R-HSA-6803207	R-HSA-9630791
R-HSA-2151201	R-HSA-5654700
R-HSA-1912420	R-HSA-6796648
R-HSA-140834	R-HSA-5689896
R-HSA-5602636	R-HSA-1483166
R-HSA-6804759	R-HSA-167238
R-HSA-975871	R-HSA-8851805
R-HSA-3772470	R-HSA-8849470
R-HSA-6803204	R-HSA-5339716
R-HSA-1810476	R-HSA-5625900
R-HSA-975138	R-HSA-380612
R-HSA-71032	R-HSA-452723
R-HSA-975144	R-HSA-1181150
R-HSA-430039	R-HSA-196299
R-HSA-8948747	R-HSA-2206308
R-HSA-4641265	R-HSA-1566977
R-HSA-194306	R-HSA-6781827
R-HSA-77285	R-HSA-159782
R-HSA-975155	R-HSA-6802953
R-HSA-6803544	R-HSA-3371378
R-HSA-73817	R-HSA-112411
R-HSA-430116	R-HSA-6782315
R-HSA-73933	R-HSA-2395516
R-HSA-1369007	R-HSA-9026519
R-HSA-5666185	R-HSA-198693
R-HSA-2404192	R-HSA-8939243
R-HSA-9629232	R-HSA-176407
R-HSA-6791462	R-HSA-2179392
R-HSA-428643	R-HSA-1169092
R-HSA-8854521	R-HSA-1632852
R-HSA-937039	R-HSA-5654720
R-HSA-76009	R-HSA-2559585
R-HSA-933542	R-HSA-8948700
R-HSA-205043	R-HSA-3656234
R-HSA-201451	R-HSA-140342
R-HSA-168927	R-HSA-4086398
R-HSA-450321	R-HSA-140534
R-HSA-72731	R-HSA-9660821
R-HSA-75893	R-HSA-203927
R-HSA-5336415	R-HSA-381183
R-HSA-9029569	R-HSA-2206292
R-HSA-140837	R-HSA-77352
R-HSA-1482925	R-HSA-3928663
R-HSA-428359	R-HSA-901032
	R-HSA-163754
	R-HSA-202733
	R-HSA-165181
	R-HSA-199418
	R-HSA-5467348
	R-HSA-8964540
	R-HSA-165159
	R-HSA-446343
	R-HSA-8849471
	R-HSA-168179
	R-HSA-5654726
	R-HSA-2173789
	R-HSA-166663
	R-HSA-113418
	R-HSA-4086400
	R-HSA-2173791
	R-HSA-9646303
	R-HSA-9020933
	R-HSA-392517
	R-HSA-71737
	R-HSA-198203
	R-HSA-432720
	R-HSA-9646304
	R-HSA-5467340
	R-HSA-110056
	R-HSA-1250347
	R-HSA-449836
	R-HSA-8963684
	R-HSA-1963640
	R-HSA-417957
	R-HSA-9020591
	R-HSA-8934593
	R-HSA-167044
	R-HSA-6804757
	R-HSA-5602636
	R-HSA-5654695
	R-HSA-912694
	R-HSA-9634285
	R-HSA-168188
	R-HSA-9614399
	R-HSA-9020958
	R-HSA-9632697
	R-HSA-430039
	R-HSA-8948747
	R-HSA-167200
	R-HSA-5673000
	R-HSA-5619063
	R-HSA-6803157
	R-HSA-6803544
	R-HSA-8939211
	R-HSA-430116
	R-HSA-6784531
	R-HSA-2142712
	R-HSA-5666185
	R-HSA-190372
	R-HSA-69416
	R-HSA-8854691
	R-HSA-111471
	R-HSA-933542
	R-HSA-77289
	R-HSA-8875360
	R-HSA-9034864
	R-HSA-8943723
	R-HSA-1839117
	R-HSA-1482925
	R-HSA-1059683
