# Supplementary material for: Integrated Data Analysis Uncovers New COVID-19 Related Genes and Potential Drug Re-Purposing Candidates
Source: Int J Mol Sci. 2023 Jan 11;24(2):1431. doi: 10.3390/ijms24021431 (PMC9863794; doi:10.3390/ijms24021431)
Supplement: Supplementary file 1 [file ijms-24-01431-s001.zip › S3 File-Patient_top_100_rewired_genes_and_drugs.csv]

Gene	GDV distance	Drug
ZNF35	0.510779	NADH
RPSAP58	0.492115	NADH
ZNF562	0.490918	NADH
OLFM2	0.445476	Fostamatinib
CYB561	0.444635	Zinc chloride
ZNF41	0.443754	Fostamatinib
LCMT2	0.439522	N-Formylmethionine
CSTF2T	0.436706	NADH
NUP85	0.432417	Cladribine
REEP4	0.431098	Fostamatinib
ASRGL1	0.430141	NADH
ZFP62	0.423932	Artenimol
CBX5	0.421948	Acetylsalicylic acid
KLHL9	0.419467	Artenimol
ZNF189	0.406606	Fostamatinib
ZNF597	0.403914	NADH
HIST2H2AC	0.389339	Artenimol
CSTF1	0.387894	Fostamatinib
ZNF507	0.384479	NADH
ZNF286A	0.384478	NADH
SETMAR	0.382962	NADH
LIPT1	0.376682	Artenimol
NUP43	0.375005	Fostamatinib
USP27X	0.369371	Felodipine
ZNF473	0.366795	NADH
ZNF354A	0.364508	Fostamatinib
ICMT	0.360126	NADH
DEFB4A	0.359541	Zinc
PSIP1	0.358552	NADH
EXOSC9	0.356766	Artenimol
CBX1	0.354188	Fostamatinib
ARL6IP1	0.354075	NADH
CKAP5	0.350011	NADH
CCP110	0.347256	Fostamatinib
CDC25B	0.346142	Cladribine
CARHSP1	0.346058	Cladribine
UNG	0.345852	Cladribine
DDR1	0.345758	Zinc
PRPS2	0.345271	NADH
ZNF184	0.344548	Artenimol
SPRR2D	0.344471	Zinc
ZBTB49	0.3435	Fostamatinib
FN3KRP	0.340683	Cladribine
UBR7	0.340215	Cladribine
TP53RK	0.339479	Fostamatinib
CKS2	0.338261	Copper
SMC1A	0.335431	Copper
RBAK	0.333854	NADH
TFDP1	0.330326	Fostamatinib
ZNF200	0.329949	Fostamatinib
TSPAN15	0.327092	Fostamatinib
IL24	0.321446	Glycyrrhizic acid
AMMECR1L	0.319794	Fostamatinib
ZSCAN16	0.316528	Fostamatinib
ABCA3	0.316501	Felodipine
TINCR	0.314577	Zinc
TNNC1	0.312436	Zinc
STMN3	0.311406	Felodipine
ZNF780A	0.311159	NADH
LBH	0.31075	Artenimol
S1PR5	0.308754	Zinc
TFF3	0.306423	Zinc
TGM1	0.306142	Zinc
PGC	0.302842	Zinc
STXBP1	0.300927	Artenimol
VAMP5	0.299786	Carfilzomib
CDKN2C	0.299212	Cladribine
SCGB1A1	0.297161	Zinc
PFDN5	0.295701	Alpha-Hydroxy-Beta-Phenyl-Propionic Acid
ANKRD49	0.295062	Fostamatinib
ALG5	0.294408	Copper
HIST1H1C	0.294326	Artenimol
ZNF558	0.291919	NADH
PSMB9	0.291845	N-Formylmethionine
SLC25A38	0.291409	Guanosine-5'-Diphosphate
CACNB3	0.290502	Artenimol
MAF	0.290059	Zinc
TRIB2	0.287809	Artenimol
FOLR1	0.285882	Zinc
UTP14C	0.285457	Fostamatinib
SCGB3A1	0.285346	Zinc
TMEM106C	0.28367	Cladribine
ZBED5	0.282824	Fostamatinib
GJB2	0.280851	Zinc
HIST1H2AE	0.280843	Artenimol
GSDMD	0.280688	Carfilzomib
ZNF302	0.280267	Artenimol
MAFB	0.280088	Zinc
HLA-DOB	0.279586	Copper
KLF5	0.279231	Fostamatinib
CD9	0.278676	Artenimol
IRF2	0.278479	Fostamatinib
ODF2	0.278475	Cladribine
ANXA3	0.278425	Zinc
TNFRSF18	0.278278	Glycyrrhizic acid
GSPT2	0.275755	Artenimol
ZNF595	0.274874	NADH
NRSN2	0.274549	Fostamatinib
APOBEC3C	0.273625	Carfilzomib
ZFP1	0.272482	NADH
